# Supplementary material for: Effectiveness of psychological, psychoeducational and psychosocial interventions to prevent postpartum depression in adolescent and adult mothers: study protocol for a systematic review and meta-analysis of randomised controlled trials
Source: PubMed Central journal article supplement — BMJ Open. 2020 May 17;10(5):e034424. doi: 10.1136/bmjopen-2019-034424 (PMC7239544; doi:10.1136/bmjopen-2019-034424), 2020-05-17
Supplement: bmjopen-2019-034424supp001.pdf [file bmjopen-2019-034424supp001.pdf]

## Supplementary file: PICOS Search Strategy

|       |              |                                                                                                                                                                                                                                                                                                                                                                                                                                                                                                                                                                                                                  |
|-------|--------------|------------------------------------------------------------------------------------------------------------------------------------------------------------------------------------------------------------------------------------------------------------------------------------------------------------------------------------------------------------------------------------------------------------------------------------------------------------------------------------------------------------------------------------------------------------------------------------------------------------------|
| PICOS | Population   | No restriction                                                                                                                                                                                                                                                                                                                                                                                                                                                                                                                                                                                                   |
|       | Intervention | ((prevent*[Title/Abstract]) AND (((intervention*[Title/Abstract]) OR program*[Title/Abstract]) OR strategy*) OR course[Title/Abstract]))                                                                                                                                                                                                                                                                                                                                                                                                                                                                         |
|       | Comparator   | No restriction                                                                                                                                                                                                                                                                                                                                                                                                                                                                                                                                                                                                   |
|       | Outcome      | ((((((((depress*[Title/Abstract]) OR "depressive disorder"[Title/Abstract]) OR "depressive disorder"[MeSH Terms]) OR depression[Title/Abstract]) OR depression[MeSH Terms]) OR depression, postpartum[MeSH Terms])) AND (((((((((((postpartum[Title/Abstract]) OR postnatal[Title/Abstract]) OR puerperal[Title/Abstract]) OR perinatal[Title/Abstract]) OR prenatal[Title/Abstract]) OR antenatal[Title/Abstract]) OR intrapartum[Title/Abstract]) OR pregnancy[Title/Abstract]) OR pregnancy[MeSH Terms]) OR "pregnant women"[Title/Abstract]) OR "pregnant women"[MeSH Terms]) OR matern*[Title/Abstract])))) |
|       | Study design | (((((("randomized controlled trial"[Publication Type]) OR random*[Title/Abstract]) OR controlled [Title/Abstract]) OR trial[Title/Abstract]) OR "clinical trial"[Title/Abstract]) OR "controlled clinical trial"[Publication Type])                                                                                                                                                                                                                                                                                                                                                                              |

No population and comparator restrictions included in the search strategy. The selection was performed using the inclusion and exclusion criteria.
